# Supplementary material
Source: HighWire-hosted journal article supplement (https://www.jneurosci.org/highwire/filestream/599987/field_highwire_adjunct_files/4/Supplemental_Legend.pdf)
Supplement: Supplemental_Legend.pdf [file Supplemental_Legend.pdf]

**Figure S1.** *A*, Histological section from a mouse brain after removal of the wire-array. The arrow indicates the position where one electrode tip was located in stratum pyramidale. *B*, Histological section from a mouse brain after removal of a silicone-probe (50  $\mu\text{m}$  intersite spacing). The lesioning site of the probe (marked in red) was located in stratum radiatum (lower arrow), about 100  $\mu\text{m}$  from stratum pyramidale (upper arrow).

**Figure S2.** *A*, Power of ripples during awake immobility (AI, thin lines) and SWS (thick lines, as in Fig. 1C, to allow comparison between states). *B*, Average sharp wave profiles during AI and SWS.

**Figure S3.** Modulation of firing probability (*A*) and histogram of preferred discharge phases (*B*) of all pyramidal cells recorded during ripple-oscillations (single units without selection for isolation distance; 38 cells from control and 218 cells from PV- $\Delta\text{GluR-A}$  mice).

**Figure S4.** *A*, Autocorrelations computed from spike-trains of interneurons during ripple-oscillations (group averages, mean $\pm$ SEM). *B*, Cumulative probability density plots of the first peak timing from individual interneuron autocorrelations (ACG,  $p \approx 0.08$  for lags  $\leq 8$  ms).
